# Supplementary material for: Source attribution of Arctic black carbon and sulfate aerosols and associated Arctic surface warming during 1980–2018
Source: Copernicus journal article supplement (doi:10.5194/acp-20-9067-2020), 2020-07-30
Supplement: Supplementary file 1 [file acp-20-9067-2020-supplement.pdf]

Supplement of Atmos. Chem. Phys., 20, 9067–9085, 2020  
<https://doi.org/10.5194/acp-20-9067-2020-supplement>  
© Author(s) 2020. This work is distributed under  
the Creative Commons Attribution 4.0 License.

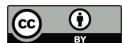

*Supplement of*

## **Source attribution of Arctic black carbon and sulfate aerosols and associated Arctic surface warming during 1980–2018**

**Lili Ren et al.**

*Correspondence to:* Yang Yang ([yang.yang@nuist.edu.cn](mailto:yang.yang@nuist.edu.cn))

The copyright of individual parts of the supplement might differ from the CC BY 4.0 License.

## **Contents of this file**

Figures S1 to S4

## **Introduction**

This auxiliary material contains supporting figures for source attribution of Arctic black carbon and sulfate aerosols, associated Arctic surface warming and emissions.

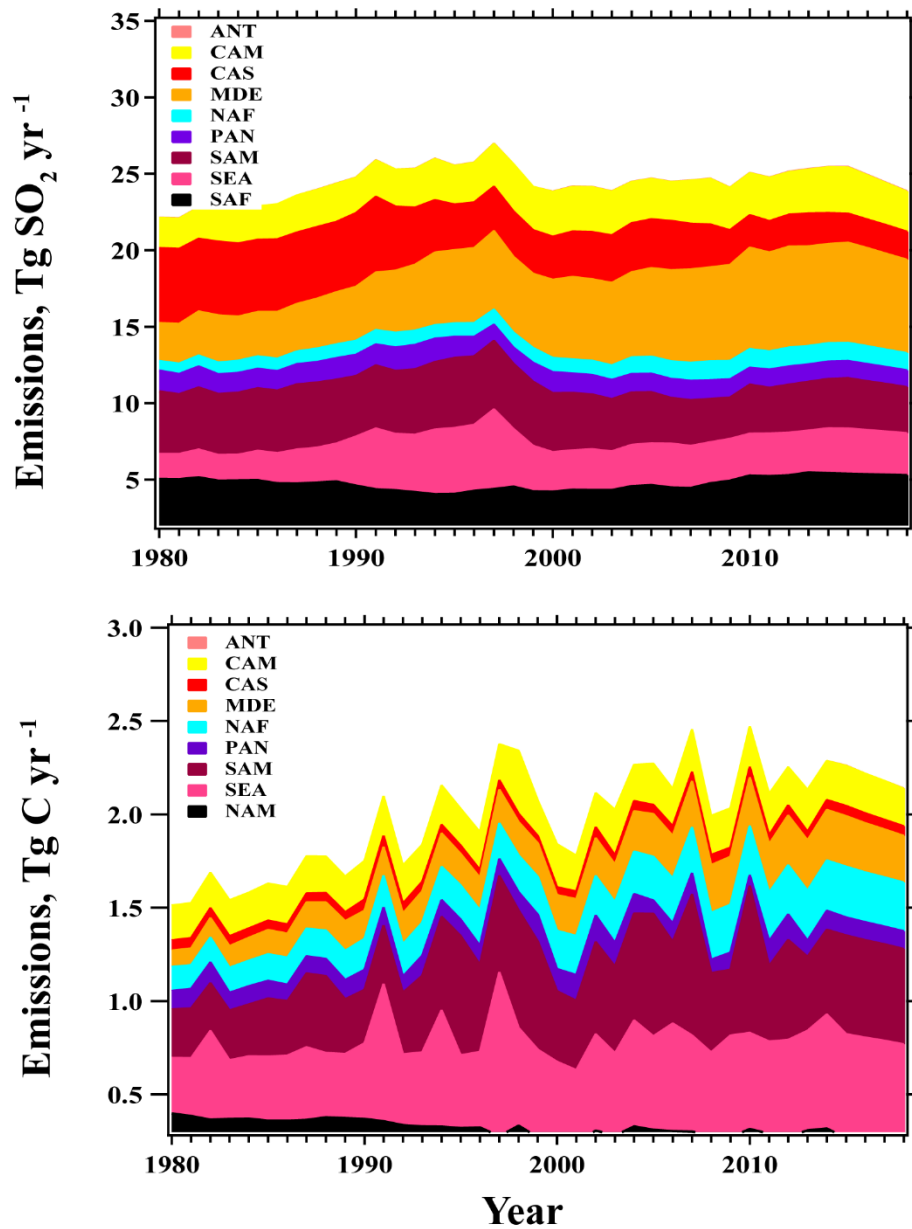

**Figure S1.** Time series of annual anthropogenic (top) SO<sub>2</sub> (Tg SO<sub>2</sub> yr<sup>-1</sup>) and (bottom) BC (Tg C yr<sup>-1</sup>) emissions from other regions of Fig. 2 individually.

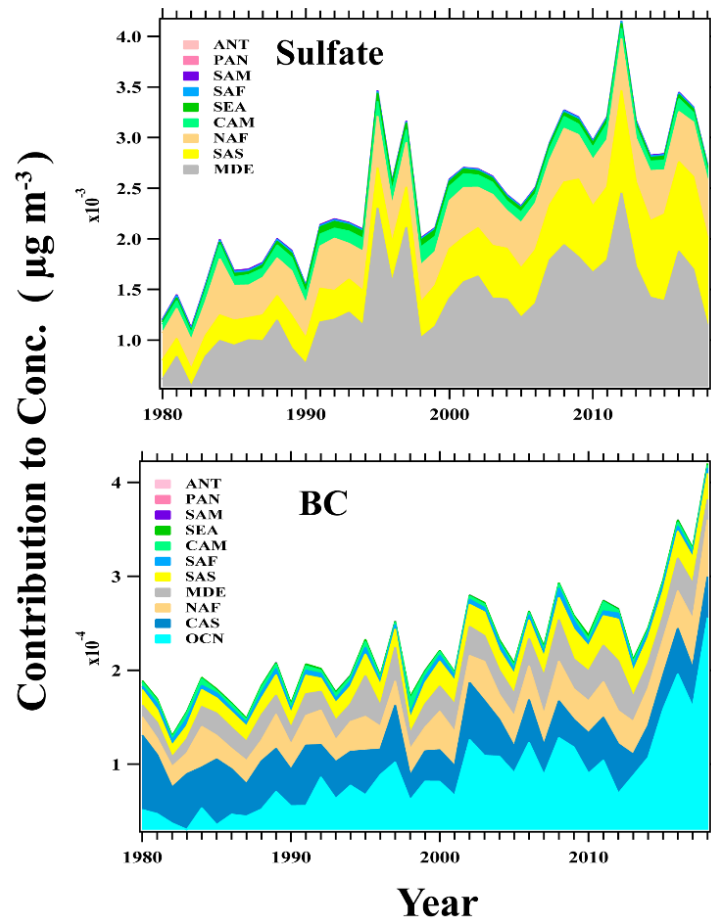

**Figure S2.** Time series (1980–2018) of absolute (left,  $\mu\text{g m}^{-3}$ ) contributions of emissions from OTH source regions to the simulated annual mean near-surface sulfate and BC concentrations averaged over the Arctic.

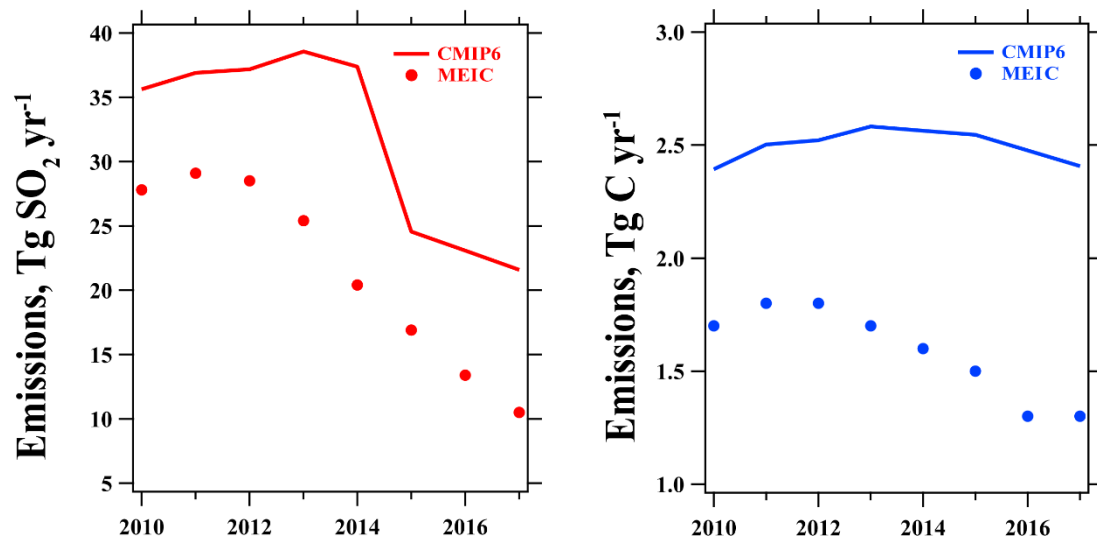

**Figure S3.** Annual anthropogenic emissions of SO<sub>2</sub> and BC in China from CMIP6 (solid lines) and MEIC (dotted lines).

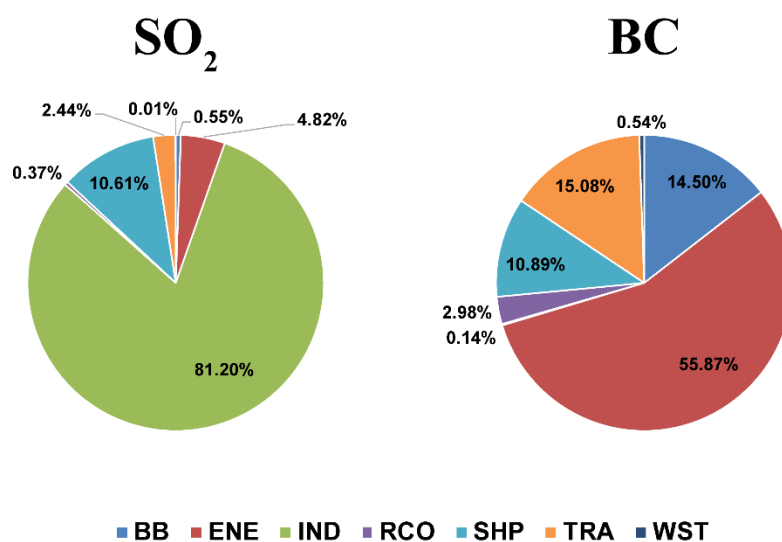

**Figure S4.** Annual mean of SO<sub>2</sub> and BC emissions from individual sectors in the Arctic during 2010-2014. BB: biomass burning, ENE: energy, IND: industry, RCO: residential, SHP: international shipping, TRA: transportation, WST: waste treatment.
